# Supplementary material for: Calmodulation meta-analysis: Predicting calmodulin binding via canonical motif clustering
Source: PubMed Central journal article supplement — J Gen Physiol. 2014 Jul;144(1):105–14. doi: 10.1085/jgp.201311140 (PMC4076516; doi:10.1085/jgp.201311140), 2014-07
Supplement: supp_jgp.201311140_JGP_201311140_sm.pdf [file supp_jgp.201311140_JGP_201311140_sm.pdf]

Mruk et al., <http://www.jgp.org/cgi/content/full/jgp.201311140/DC1>

Tables S1 and S2 are available for download as Excel files.

|             | S1                                 | S2                             | S3                        |
|-------------|------------------------------------|--------------------------------|---------------------------|
| Motif Score | 04AAACZZZZZZZZZZC885               | 36ACCEZZZZZZZZFFB883           | 022588ACCCBBB9960000      |
| Residue     | 98 AFVYHVFIFLLVFSCLVLSVL 118 132   | LLILEFVMIVVFGLEYIVRVW 152 173  | PFCVIDFIVFVASVAVIAAGT 193 |
| 1-10        | 1222234556655543221                | 12333333444433333221           | 1112234444333221          |
| 1-5-10      | 12222345555444432111               | 1222222221                     | 112333333221              |
| 1-12        | 11112334555544443221               | 112223445666554443221          | 111111111111111           |
| 1-14        | 111123333333322221                 | 1112223333333222111            | 111111111111111           |
| 1-8-14      | 1111111111111111                   | 1112222222222111               | 111111111111111           |
| 1-5-8-14    | 1111111111111111                   | 111111111111111                | 111111111111111           |
| 1-16        | 122233333333332111                 | 122233333333332111             | 1111111111111111          |
|             | S4                                 | S5                             | S6                        |
| Motif Score | 0111111223322333333333             | 4777CCDDFZZZFEBBBA422          | 03666666779776443333      |
| Residue     | 202 ALRSMRFLQILRMVMDRRGGTW 224 238 | LITAWYIGFLVLI FASFLVYL 258 297 | RVLAAGFALLGISFFALPAGI 317 |
| 1-10        | 1111111111 1111111111              | 122233334544443333211          | 1111111121111111111       |
| 1-5-10      |                                    | 111122234333322221             | 1111111121111111111       |
| 1-12        |                                    | 1222233344432222111            | 1111111222211111111       |
| 1-14        | 1111111111111111                   | 11112222222221111              | 111111111111111           |
| 1-8-14      |                                    | 111111111111111                | 111111111111111           |
| 1-5-8-14    |                                    | 111111111111111                |                           |
| 1-16        | 1111111111111111                   | 1111111111111111               | 1111111111111111          |

**Figure S1.** A positive charge discriminator excludes most KCNQ4 transmembrane domains from being predicted as CaM-binding domains. Depiction of the canonical CaM-binding motifs within each transmembrane domain (S1–S6) of KCNQ4 channels. Totals (in hexadecimal) for each residue are shown. Values greater than F are scored as “Z.” Yellow highlighted residues denote the meta-analysis predictions.
